# Supplementary material
Source: publisher figshare collection journal article supplement (https://tandf.figshare.com/articles/dataset/_/11559030)
Supplement: Supplementary file 1 [file 1]

Supplementary table 2. Statistical data of predatory behavior. The parameters evaluated by the time were analyzed by the 2-way ANOVA; the frequencies and latencies were analyzed by the one-way ANOVA or the Kruskal-Wallis test.

| Two-way ANOVA          |                              |                                |                              |
|------------------------|------------------------------|--------------------------------|------------------------------|
| Parameter              | Time                         | Treatments                     | Interaction                  |
| Time of insect contact | F (2,45) =0.86,<br>p = 0.43  | F (2,45) = 11.45,<br>p< 0.0001 | F (4,45) = 0.38,<br>p = 0.82 |
| Time of foraging       | F (2,45) = 6.09<br>P = 0.04  | F (2,45) = 1.19,<br>P = 0.31   | F (4,45) = 0.28,<br>P = 0.89 |
| Time of eat insects    | F (2,45) =17.06,<br>P< 0.005 | F (2,45) = 1.10,<br>P 0.13     | F (4,45) = 0.11,<br>P = 0.98 |
| One-way ANOVA          |                              |                                |                              |
| Frequencies            |                              |                                |                              |
| Insect contact         | F= 0.78                      | P = 0.09                       |                              |
| Foraging               | F = 0.47                     | P= 0.64                        |                              |
| Eat insect             | F= 0.56                      | P = 0.07                       |                              |
| Latencies to           |                              |                                |                              |
| Insect contact         | KW= 6.04                     | P = 0.04                       |                              |
| Foraging               | KW = 6.25                    | P = 0.04                       |                              |
| Eat insect             | KW = 7.29                    | = 0.02                         |                              |
