# Supplementary material
Source: publisher figshare collection journal article supplement (https://tandf.figshare.com/articles/dataset/_/11559030)
Supplement: Supplementary file 2 [file 1]

Archive with 2 entries (2 files):
- ines_a_1706505_sm5683.pdf
- ines_a_1706505_sm5637.pdf
