# Supplementary material
Source: publisher figshare collection journal article supplement (https://tandf.figshare.com/articles/dataset/_/11559030)
Supplement: Supplementary file 2 [file 1 › ines_a_1706505_sm5637.pdf]

Supplementary table 1. Statistical data of maternal behavior. The parameters evaluated by the time were analyzed by the 2-way ANOVA; the frequencies and latencies were analyzed by the one-way ANOVA or the Kruskal-Wallis test.

| Two-way ANOVA        |                                 |                                 |                              |
|----------------------|---------------------------------|---------------------------------|------------------------------|
| Parameter            | Time                            | Treatments                      | Interaction                  |
| Time of pup contact  | F (2,45) = 5.22,<br>p = 0.009   | F (2,45) = 11.68,<br>p < 0.0001 | F (4,45) = 0.74,<br>p = 0.57 |
| Time of pup grouping | F (2,45) = 6.16<br>P = 0.04     | F (2,45) = 1.19,<br>P = 0.31    | F (4,45) = 0.28,<br>P = 0.89 |
| Time of pup grooming | F (2,45) = 17.06,<br>P < 0.0001 | F (2,45) = 6.69,<br>P 0.003     | F (4,45) = 2.66,<br>P = 0.05 |
| Time of kyphosis     | F (2,45) = 1.32,<br>P = 0.28    | F (2,45) = 1.68,<br>P = 0.20    | F (4,45) = 0.56, p<br>= 0.69 |
| One-way ANOVA        |                                 |                                 |                              |
| Frequencies          |                                 |                                 |                              |
| Pup contact          | F = 4.50                        | P = 0.03                        |                              |
| Pup grouping         | KW = 7.91                       | P = 0.01                        |                              |
| Pup grooming         | F = 0.44                        | P = 0.65                        |                              |
| Kyphosis             | F = 4.61                        | P = 0.03                        |                              |
| Latencies to         |                                 |                                 |                              |
| Pup contact          | KW = 6.30                       | P = 0.04                        |                              |
| Pup grouping         | KW = 7.56                       | P = 0.02                        |                              |
| Pup grooming         | KW = 0.91                       | P = 0.59                        |                              |
| Kyphosis             | KW = 0.90                       | P = 0.62                        |                              |
